# Supplementary material for: Psychometric assessment of the Runyankole-translated Marlowe-Crowne Social Desirability Scale among persons with HIV in Uganda
Source: PubMed Central journal article supplement (PMC11186284; doi:10.1186/s12889-024-18886-z), 2024-06-19
Supplement: 12889_2024_18886_MOESM1_ESM.pdf [file 12889_2024_18886_MOESM1_ESM.pdf]

# Supplementary Material

Supplementary Figure 1. Option characteristic curves for all 28 items in the Runyankole-translated Marlowe-Crowne Social Desirability Scale

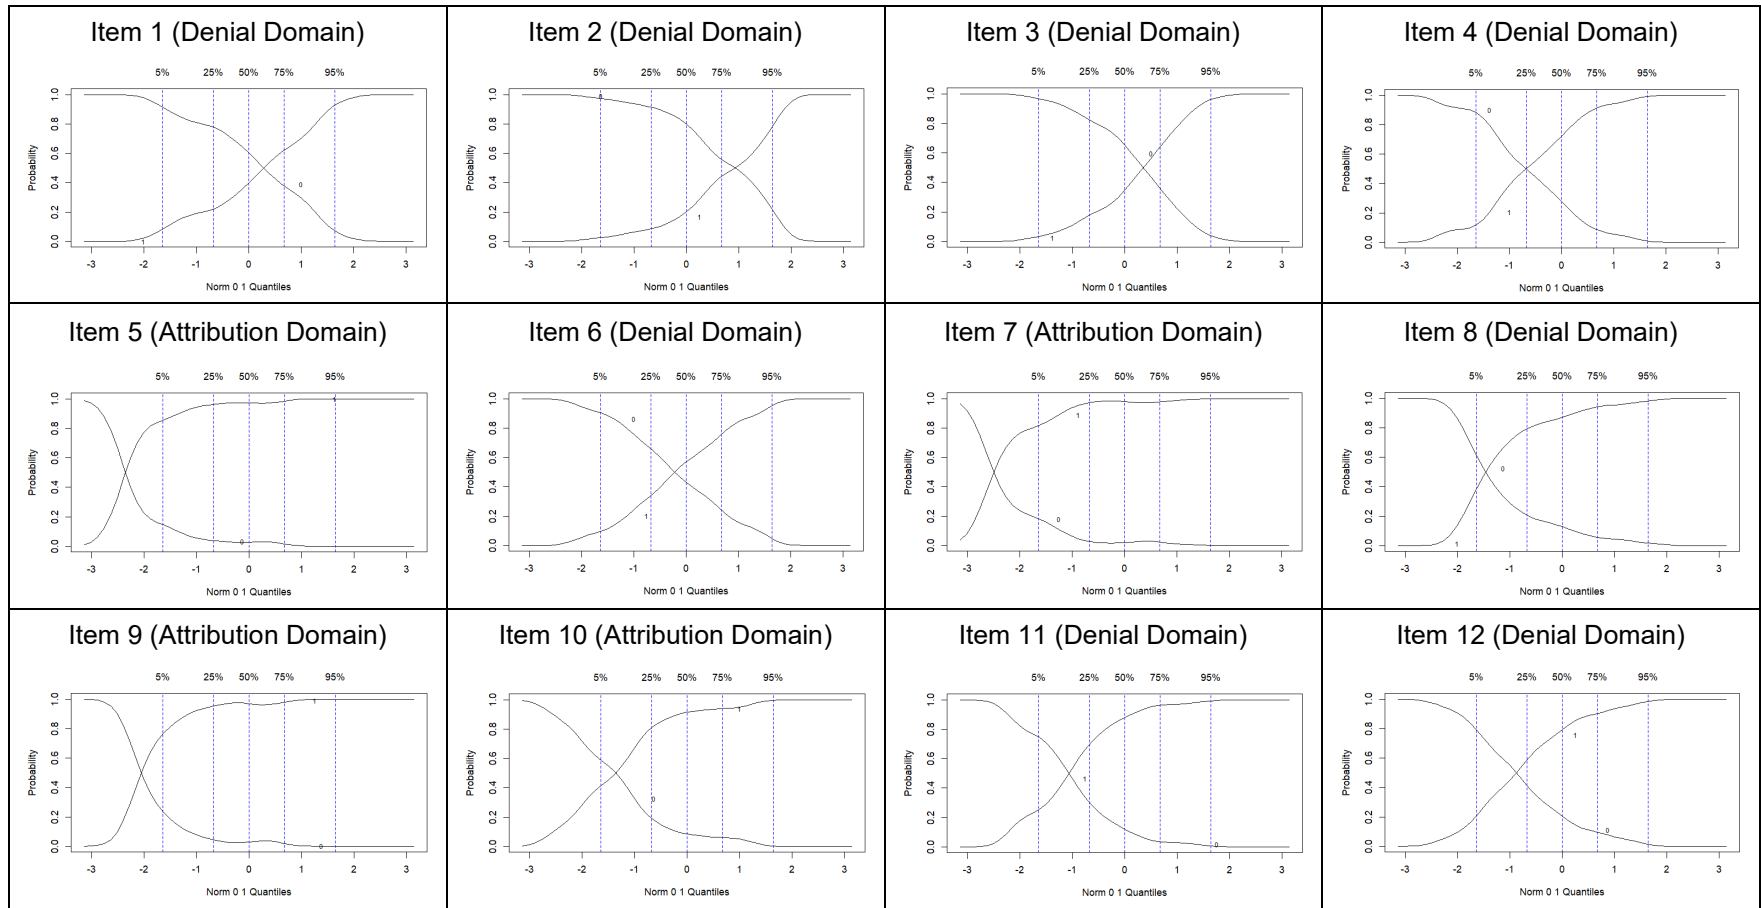

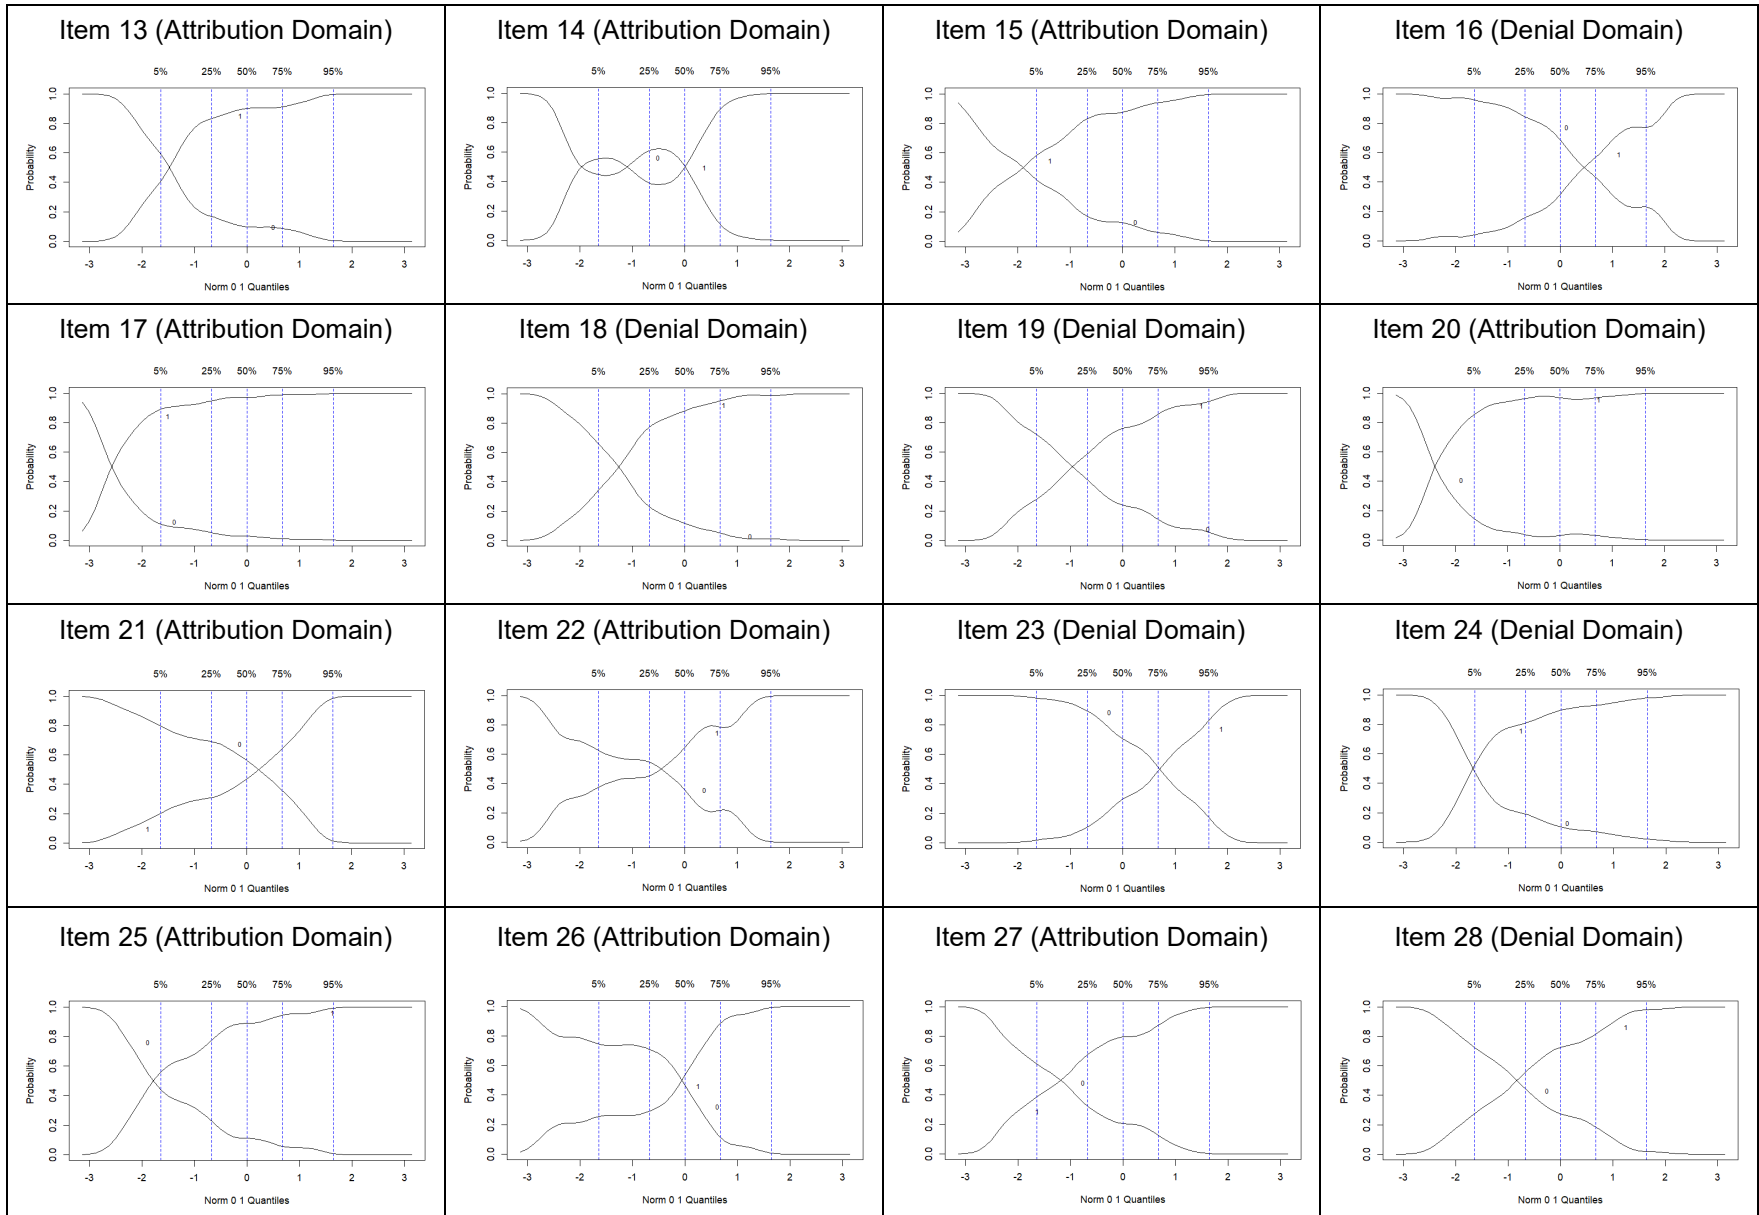

Supplementary Figure 2. Reliability function for the 14-item Attribution Domain plotting Cronbach's alpha coefficient values along the spectrum of possible scores.

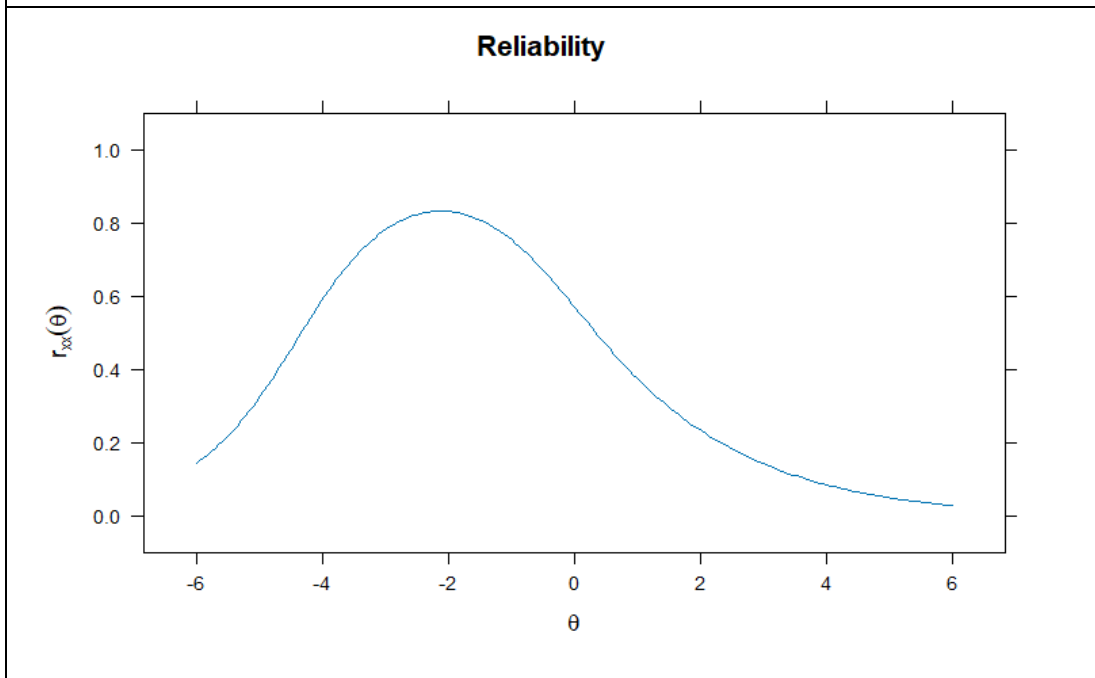

Supplementary Table 1. English and Runyankole-translated items from the adapted\* Alcohol Use Disorders Identification Test – Consumption (AUDIT-C)

| English (original)                                                                                                         | Runyankole (translated)                                                                                                |
|----------------------------------------------------------------------------------------------------------------------------|------------------------------------------------------------------------------------------------------------------------|
| In the past 3 months, how often did you have a drink containing alcohol? <sup>a</sup>                                      | Nikangahi obu onyweire ekyokunywa kirimu ebirikusinza omumeezi 3 agahingwire? <sup>b</sup>                             |
| How many drinks containing alcohol did you have on a typical day when you were drinking in the past 3 months? <sup>c</sup> | Omumeezi 3 agahweire onyweire ebirikusinza birikwingana ki aha izooba rimwe obwobere nonywa ebirikusinza? <sup>d</sup> |
| How often did you have six or more drinks on one occasion in the past 3 months? <sup>e</sup>                               | Nikangahi obu onyweire emisha mukaaga nokukiraho ahamurundi gumwe omumeezi 3 agahingwire? <sup>f</sup>                 |

\*The AUDIT-C was adapted to ask study participants to recall their drinking behavior in the past three months.

<sup>a</sup> Response options in English: never, monthly or less, 2 to 4 times per month, 2 to 3 times per week, 4 or more times per week

<sup>b</sup> Response options translated in Runyankole: tiburiho, buri kwezi nari ahansi yokwezi, emirundi 2 kuhitsya 4 buri kwezi, Emirundi 2 kuhitsya 3 buri sande, emirundi 4 nari okukiraho buri sande

<sup>c</sup> Response options in English: None, 1 or 2, 3 or 4, 5 or 6, 7 or 9, 10 or more

<sup>d</sup> Response options translated in Runyankole: tikiriho, 1 or 2, 3 or 4, 5 or 6, 7 or 9, 10 nokukiraho

Response options in English: never, less than monthly, monthly, weekly, daily or almost daily

<sup>f</sup> Response options translated in Runyankole: tiburiho, ahansi yokwezi, buri kwezi, buri sande, buri eizoba nari haihi buri eizoba

Supplementary Table 2. English and Runyankole-translated items from the adapted Duke University Religion (DUREL) Index

| English (original)                                                                                                         | Runyankole (translated)                                                                                                                   |
|----------------------------------------------------------------------------------------------------------------------------|-------------------------------------------------------------------------------------------------------------------------------------------|
| <b>Organizational Religious Activity Domain</b>                                                                            |                                                                                                                                           |
| How often do you attend church, mosque, or other religious meetings? <sup>a</sup>                                          | Nikangahi obu orikuza omukanisa / omukereziya, omumuzigiti, nari ezindi nteerane zediini? <sup>b</sup>                                    |
| <b>Non-Organizational Religious Activity Domain</b>                                                                        |                                                                                                                                           |
| How often do you spend time in private religious activities, such as prayer, meditation or Bible/Koran study? <sup>c</sup> | Nikangahi obu orikumara obwire oyehereire omubikorwa byediini, nka okushaba,okushoma ebitabo ebirikwera nka Baibuli / Koran? <sup>d</sup> |
| <b>Intrinsic Religiosity Domain</b>                                                                                        |                                                                                                                                           |
| In my life, I experience the presence of the Divine (i.e., God) <sup>e</sup>                                               | Omumagara gangye, ninyehuramu obwa Rukiraboona (Ruhanga) <sup>f</sup>                                                                     |
| My religious beliefs are what really lie behind my whole approach to life <sup>e</sup>                                     | Enyikiriza zangye omudiini nibyo birikutuma okundikutwara ensi <sup>f</sup>                                                               |
| I try hard to carry my religion over into all other dealings in life <sup>e</sup>                                          | Ningyezaho nkokukirikubaasika kureeba ngu ediini yangye nagitwara omubintu byoona ebindikukora omumagara gangye <sup>f</sup>              |

<sup>a</sup> Response options in English: never, once a year or less, a few times a year, a few times a month, once a week, more than once per week

<sup>b</sup> Response options translated in Runyankole: tiburiho, omurundi gumwe omumwaka nari ahansi yomurundi gumwe, emirundi mikye omumwaka, emirundi mikye omukwezi, omurundi gumwe omusande, okurenga ahamurundi gumwe omusande

<sup>c</sup> Response options in English: rarely or never, a few times a month, once a week, two or more times per week, daily, more than once a day

<sup>d</sup> Response options translated in Runyankole: nibukye munonga / tiburiho, emirundi mikye omukwezi, omurundi gumwe omusande, emirundi ebiri nari okukiraho omusande, buri izooba, okurenga ahamurundi gumwe omwizooba

<sup>e</sup> Response options in English: definitely not true, tends not to be true, unsure, tends to be true, definitely true of me

<sup>f</sup> Response options translated in Runyankole: buzimazima tikihihikire, nikishushana nkekitahikire, tinakikwasagye, nikishusha nkekihikire, buzimazima kihikire ahabwangye

Supplementary Table 3. Assessing differential item functioning (DIF) by gender in the denial domain of the 28-item Runyankole-translated Marlowe-Crowne Social Desirability Scale.

| Item            | p-value | DIF Effect Size | Expected Test Scores |
|-----------------|---------|-----------------|----------------------|
| 1               | 0.548   | 0.151           |                      |
| 2 <sup>a</sup>  | -       | -               |                      |
| 3               | 0.008   | -0.170          |                      |
| 4               | 0.660   | -0.025          |                      |
| 6               | 0.001   | 0.109           |                      |
| 8               | 0.650   | -0.239          |                      |
| 11              | 0.180   | -0.168          |                      |
| 12              | 0.293   | -0.019          |                      |
| 16              | 0.753   | -0.364          |                      |
| 18              | 0.217   | -0.193          |                      |
| 19              | 0.025   | 0.147           |                      |
| 23 <sup>a</sup> | -       | -               |                      |
| 24              | 0.254   | -0.293          |                      |
| 28              | 0.600   | -0.115          |                      |

<sup>a</sup> Used as anchor item

Supplementary Table 4. Linear regression of the association between the modified 27-item Runyankole-translated Marlowe-Crowne Social Desirability Scale and self-reported alcohol use stratified by study

|                                   | Study          |                |                 |
|-----------------------------------|----------------|----------------|-----------------|
|                                   | DIPT (n=599)   | Extend (n=261) | ADEPT-T (n=293) |
| <b>Unadjusted Model</b>           |                |                |                 |
| Self-reported alcohol use $\beta$ | -0.10          | -0.02          | -0.10           |
| 95% CI                            | -0.15 to -0.04 | -0.13 to 0.08  | -0.21 to 0.01   |
| p-value                           | <0.01          | 0.67           | 0.07            |
| <b>Adjusted<sup>a</sup> Model</b> |                |                |                 |
| Self-reported alcohol use $\beta$ | -0.08          | -0.01          | -0.07           |
| 95% CI                            | -0.13 to -0.03 | -0.12 to 0.10  | -0.16 to 0.02   |
| p-value                           | <0.01          | 0.88           | 0.12            |

Abbreviations: ADEPT-T= the Alcohol Drinkers' Exposure to Preventive Therapy for TB study, AUDIT-C= Alcohol Use Disorders Identification Test – Consumption,  $\beta$ = beta coefficient, CI= confidence interval, DIPT= the Drinkers' Intervention to Prevent Tuberculosis RCT, Extend= the Mobile Technology to Extend Clinic-Based Counseling for HIV+s in Uganda RCT

<sup>a</sup> Adjusted for age, gender, education, depression, religiosity, and the alcohol biomarker phosphatidylethanol.
